# Supplementary material
Source: ML conference proceedings conference paper supplement (https://openreview.net/forum?id=7yYhsfQROU)
Supplement: supplementary_material [file t2i_diversity.xlsx]

## Sheet: Sheet1
Category	Prompt	Aspect	Overall Category
Apple	An image of an apple.	Color	Food & Drink
Book	A photograph of a book.	Thickness	Human-made object
Bowl of soup	An image of a bowl of soup.	Ingredients	Human-made object
Bridge	A photograph of a bridge.	Shape	Human-made object
Building	An image of a building.	Architectural style	Human-made object
Cake	A photograph of a cake.	Flavour	Food & Drink
Car	A photograph of a car.	Type	Human-made object
Cathedral	A photograph of a cathedral.	Architectural style	Human-made object
Clocktower	An image of a clocktower.	Height	Human-made object
Dress	A photograph of a dress.	Style	Human-made object
Fish	A photograph of a fish.	Species	Nature
Flower	An image of a flower.	Species	Nature
River	A photograph of a river.	Width	Nature
Smartphone	An image of a smartphone.	Brand	Human-made object
Shoes	A photograph of shoes.	Type	Human-made object
Tower	An image of a tower.	Purpose	Human-made object
Bicycle	A picture of a bicycle.	Type	Human-made object
Bird	A photograph of a bird.	Species	Nature
Boat	An image of a boat.	Type	Human-made object
Chair	A photograph of a chair.	Style	Human-made object
Coffee cup	A picture of a coffee cup.	Material	Food & Drink
Dog	A photograph of a dog.	Breed	Nature
Door	An image of a door.	Material	Human-made object
Elephant	A picture of an elephant.	Age	Nature
Forest	An image of a forest.	Density	Nature
Fruit	A photograph of fruit.	Type	Food & Drink
Guitar	An image of a guitar.	Type	Human-made object
Horse	A picture of a horse.	Breed	Nature
House	A photograph of a house.	Architectural style	Human-made object
Key	A picture of a key.	Type	Human-made object
Lamp	An image of a lamp.	Style	Human-made object
Mountain	A photograph of a mountain.	Height	Nature
Mushroom	A picture of a mushroom.	Species	Nature
Ocean	A photograph of the ocean.	State (calm, stormy)	Nature
Plane	A picture of a plane.	Type	Human-made object
Plant	An image of a plant.	Species	Nature
Road	A photograph of a road.	Condition	Human-made object
Rock	An image of a rock.	Texture	Nature
Sky	A photograph of the sky.	Time of day	Nature
Spoon	An image of a spoon.	Material	Human-made object
Table	A photograph of a table.	Material	Human-made object
Tree	An image of a tree.	Species	Nature
Window	A photograph of a window.	Shape	Human-made object
Bus	A picture of a bus	Type	Human-made object
Butterfly	A photograph of a butterfly	Species	Nature
Candle	An image of a candle	Color	Human-made object
Computer	A photograph of a computer	Type	Human-made object
Desk	An image of a desk	Material	Human-made object
Giraffe	A picture of a giraffe	Age	Nature
Glass	An image of a glass	Shape	Human-made object
Hat	A photograph of a hat	Style	Human-made object
Headphones	A picture of headphones	Type	Human-made object
Island	A photograph of an island	Size	Nature
Knife	An image of a knife	Type	Human-made object
Lake	A photograph of a lake	Size	Nature
Leaf	A picture of a leaf	Shape	Nature
Lion	A photograph of a lion	Age	Nature
Moon	A photograph of the moon	Phase	Nature
Mug	A picture of a mug	Material	Human-made object
Necklace	A photograph of a necklace	Material	Human-made object
Orange	An image of an orange	Ripeness	Nature
Painting	A photograph of a painting	Style	Human-made object
Pencil	A picture of a pencil	Sharpness	Human-made object
Phone	A photograph of a phone	Brand	Human-made object
Pillow	An image of a pillow	Shape	Human-made object
Pizza	A photograph of pizza	Toppings	Food & Drink
Rabbit	A picture of a rabbit	Breed	Nature
Rain	A photograph of rain	Intensity	Nature
Ring	An image of a ring	Material	Human-made object
Scissors	A photograph of scissors	Type	Human-made object
Snake	A picture of a snake	Species	Nature
Socks	A photograph of socks	Color	Human-made object
Star	An image of a star	Brightness	Nature
Sun	A photograph of the sun	Time of day	Nature
Sunglasses	A picture of sunglasses	Style	Human-made object
Teapot	A photograph of a teapot	Material	Food & Drink
Tiger	An image of a tiger	Age	Nature
Train	A photograph of a train	Type	Human-made object
Truck	A picture of a truck	Type	Human-made object
Umbrella	A photograph of an umbrella	Color	Human-made object
Vase	An image of a vase	Material	Human-made object
Waterfall	A photograph of a waterfall	Height	Nature
Whale	A picture of a whale	Species	Nature
Zebra	An image of a zebra	Pose	Nature
Cucumber	A photo containing a cucumber	Shape	Food & Drink
Teddy bear	A photo of a teddy bear	Material	Human-made object
